# Supplementary material
Source: ML conference proceedings conference paper supplement (https://proceedings.mlr.press/v129/garg20a.html)
Supplement: Supplementary file [file garg20a-supp.pdf]

# Supplementary File: Robust Deep Ordinal Regression under Label Noise

**Bhanu Garg** BHANUGARG05@GMAIL.COM and **Naresh Manwani** NARESH.MANWANI@IIT.AC.IN  
*International Institute of Information Technology, Hyderabad, India*

**Editors:** Sinno Jialin Pan and Masashi Sugiyama

## 1. Proof of Theorem 1

### 1.1. Rank consistency proof for $\tilde{l}_{CE}$

We need to show that  $b_1 \geq b_2 \geq \dots \geq b_{K-1}$  at the optimal solution. Let  $\mathbf{b} = [b_1, b_2, \dots, b_{K-1}]^T$ , and  $\mathbf{b}^*$  be the optimal value of  $\mathbf{b}$ . Let  $(\mathbf{x}_i, \tilde{y}_i)$ ,  $i = 1 \dots N$  be the training set. Let for some  $j$  suppose  $b_j < b_{j+1}$ . Then we show that by replacing  $b_j$  with  $b_{j+1}$  or replacing  $b_{j+1}$  with  $b_j$  can

further decrease the loss  $\tilde{\mathbf{L}}_{CE} = \mathbf{N}^{-1}\mathbf{L}_{CE}$ , where  $\tilde{\mathbf{L}}_{CE} = \begin{bmatrix} \tilde{l}_{CE}(g(\mathbf{x}), \mathbf{b}, 1) \\ \vdots \\ \tilde{l}_{CE}(g(\mathbf{x}), \mathbf{b}, j+1) \\ \vdots \\ \tilde{l}_{CE}(g(\mathbf{x}), \mathbf{b}, K) \end{bmatrix}$  and  $\mathbf{L}_{CE} =$

$\begin{bmatrix} l_{CE}(g(\mathbf{x}), \mathbf{b}, 1) \\ \vdots \\ l_{CE}(g(\mathbf{x}), \mathbf{b}, j+1) \\ \vdots \\ l_{CE}(g(\mathbf{x}), \mathbf{b}, K) \end{bmatrix}$ . We see that the change in  $\tilde{\mathbf{L}}_{CE}$  depends on  $\mathbf{L}_{CE}$  as follows.

$$\Delta \tilde{\mathbf{L}}_{CE} = \mathbf{N}^{-1} \Delta \mathbf{L}_{CE} = \mathbf{N}^{-1} \begin{bmatrix} \Delta l_{CE}(g(\mathbf{x}), \mathbf{b}, 1) \\ \vdots \\ \Delta l_{CE}(g(\mathbf{x}), \mathbf{b}, j+1) \\ \vdots \\ \Delta l_{CE}(g(\mathbf{x}), \mathbf{b}, K) \end{bmatrix}$$

We now have to find the change  $\Delta l_{CE}(g(\mathbf{x}_i), \mathbf{b}, k)$  for every  $i \in [N]$  and every  $k \in [K-1]$ . In order to do that, we first consider the following three partitions of the training set.

$$\begin{aligned} A_1 &= \{\mathbf{x}_i : y_i < j+1 \implies z_{y_i}^j = z_{y_i}^{j+1} = 0\} \\ A_2 &= \{\mathbf{x}_i : y_i > j+1 \implies z_{y_i}^j = z_{y_i}^{j+1} = 1\} \\ A_3 &= \{\mathbf{x}_i : y_i = j+1 \implies z_{y_i}^j = 1, z_{y_i}^{j+1} = 0\} \end{aligned}$$

The above three sets are mutually exclusive and exhaustive, i.e.,  $A_1 \cup A_2 \cup A_3 = \{\mathbf{x}_1, \dots, \mathbf{x}_N\}$ . Let  $h_j(\mathbf{x}) = \sigma(g(\mathbf{x}) + b_j)$ . Now, we first find the change  $\Delta l_{CE}(g(\mathbf{x}_i), \mathbf{b}, k)$  for every  $k \in [K - 1]$  in these sets individually.

1. **Change in  $l_{CE}$  for  $\mathbf{x}_i \in A_1$ :** The change in  $l_{CE}$  when replacing  $b_j$  with  $b_{j+1}$  is,

$$\Delta^a l_{CE}(g(\mathbf{x}_i), \mathbf{b}, y_i) = \log(1 - h_j(\mathbf{x}_i)) - \log(1 - h_{j+1}(\mathbf{x}_i)).$$

The change in  $l_{CE}$  when replacing  $b_{j+1}$  with  $b_j$  is,

$$\Delta^b l_{CE}(g(\mathbf{x}_i), \mathbf{b}, y_i) = \log(1 - h_{j+1}(\mathbf{x}_i)) - \log(1 - h_j(\mathbf{x}_i)).$$

The total change in loss  $l_{CE}$  after swapping  $b_j$  and  $b_{j+1}$  is  $\Delta l_{CE}(g(\mathbf{x}), \mathbf{b}, y_i) = (\Delta^a + \Delta^b)l_{CE}(g(\mathbf{x}), \mathbf{b}, y_i) = 0$ .

2. **Change in  $l_{CE}$  for  $A_2$ :** The change in  $l_{CE}$  when replacing  $b_j$  with  $b_{j+1}$  is

$$\Delta^a l_{CE}(g(\mathbf{x}), \mathbf{b}, y_i) = \log(h_j(\mathbf{x})) - \log(h_{j+1}(\mathbf{x})).$$

The change in  $l_{CE}$  replacing  $b_{j+1}$  with  $b_j$

$$\Delta^b l_{CE}(g(\mathbf{x}), \mathbf{b}, y_i) = \log(h_{j+1}(\mathbf{x})) - \log(h_j(\mathbf{x})).$$

The total change in loss  $L_{CE}$  after swapping  $b_j$  and  $b_{j+1}$  is  $(\Delta^a + \Delta^b)l_{CE}(g(\mathbf{x}), \mathbf{b}, y_i) = 0$ .

3. **Change in  $l_{CE}$  for  $A_3$ :** The change in  $l_{CE}$  when replacing  $b_j$  with  $b_{j+1}$  is

$$\Delta^a l_{CE}(g(\mathbf{x}), \mathbf{b}, y_i) = \log(h_j(\mathbf{x})) - \log(h_{j+1}(\mathbf{x})).$$

The change in  $l_{CE}$  replacing  $b_{j+1}$  with  $b_j$

$$\Delta^b l_{CE}(g(\mathbf{x}), \mathbf{b}, y_i) = -\log(1 - h_j(\mathbf{x})) - \log(1 - h_{j+1}(\mathbf{x})).$$

The total change in loss  $l_{CE}$  after swapping  $b_j$  and  $b_{j+1}$  and given that  $b_j \geq b_{j+1}$  is

$$\begin{aligned} (\Delta^a + \Delta^b)l_{CE}(g(\mathbf{x}), \mathbf{b}, y_i) &= \log(h_j(\mathbf{x})) - \log(h_{j+1}(\mathbf{x})) \\ &\quad - (\log(1 - h_{j+1}(\mathbf{x})) - \log(1 - h_j(\mathbf{x}))) < 0 \end{aligned}$$

Hence

$$(\Delta^a + \Delta^b)l_{CE}(g(\mathbf{x}), \mathbf{b}, y_i) = \begin{cases} \delta, & \text{if } y_i = j + 1 \\ 0, & \text{if } y_i \neq j + 1 \end{cases}$$

for some  $\delta < 0$ . Now consider the equations

$$\begin{aligned} (\Delta^a + \Delta^b)\tilde{\mathbf{L}}_{CE} &= \mathbf{N}^{-1} \begin{bmatrix} (\Delta^a + \Delta^b)l_{CE}(g(\mathbf{x}), \mathbf{b}, 1) \\ \vdots \\ (\Delta^a + \Delta^b)l_{CE}(g(\mathbf{x}), \mathbf{b}, j + 1) \\ \vdots \\ (\Delta^a + \Delta^b)l_{CE}(g(\mathbf{x}), \mathbf{b}, K) \end{bmatrix} \\ \Rightarrow \begin{bmatrix} (\Delta^a + \Delta^b)\tilde{l}_{CE}(g(\mathbf{x}), \mathbf{b}, 1) \\ \vdots \\ (\Delta^a + \Delta^b)\tilde{l}_{CE}(g(\mathbf{x}), \mathbf{b}, j + 1) \\ \vdots \\ (\Delta^a + \Delta^b)\tilde{l}_{CE}(g(\mathbf{x}), \mathbf{b}, K) \end{bmatrix} &= \mathbf{N}^{-1} \begin{bmatrix} 0 \\ \vdots \\ \delta \\ \vdots \\ 0 \end{bmatrix} \end{aligned}$$

The change in loss  $\tilde{l}_{CE}$  is as follows.

$$\begin{aligned}
 (\Delta^a + \Delta^b)R_\rho &= (\Delta^a + \Delta^b)\mathbb{E}_{\tilde{y}}[\tilde{l}_{CE}(g(\mathbf{x}), \mathbf{b}, \tilde{y})] = \mathbb{E}_{\tilde{y}}[(\Delta^a + \Delta^b)\tilde{l}_{CE}(g(\mathbf{x}), \mathbf{b}, \tilde{y})] \\
 &= \mathbb{E}_{\tilde{y}}[\mathbf{N}_{(\tilde{y}, i+1)}^{-1}\delta] = \delta\mathbb{E}_{\tilde{y}}[\mathbf{N}_{(\tilde{y}, i+1)}^{-1}] = \delta\sum_{k=1}^K P(\tilde{y} = k)\mathbf{N}_{(k, i+1)}^{-1} \\
 &= \delta\sum_{k=1}^K \mathbf{N}_{(k, i+1)}^{-1}\sum_{j=1}^K P(y = j)P(\tilde{y} = k|y = j) \\
 &= \delta\sum_{j=1}^K P(y = j)\sum_{k=1}^K \eta_{(j, k)}\mathbf{N}_{(k, i+1)}^{-1} = \delta\sum_{j=1}^K P(y = j)\mathbb{I}_{\{j=i+1\}} = \delta P(y = i+1) \leq 0
 \end{aligned}$$

That means by swapping  $b_j$  and  $b_{j+1}$ , we can further reduce the total loss  $\tilde{L}_{CE}$ , which is a contradiction to the assumption that  $\mathbf{b}$  is the optimal solution under  $\tilde{L}_{CE}$ . This completes the proof that  $\tilde{l}_{CE}$  is also rank consistent.

## 1.2. Rank consistency proof for $\tilde{l}_{IMC}$

We need to show that  $b_1 \geq b_2 \geq \dots \geq b_{K-1}$  at the optimal solution. We use a similar methodology as Theorem 1 Section 1.1 to prove this. Let  $\mathbf{b} = [b_1, b_2, \dots, b_{K-1}]^T$ , and  $\mathbf{b}^*$  be the optimal value of  $\mathbf{b}$ .

Let for some  $j$  suppose  $b_j < b_{j+1}$ . Then we show that by replacing  $b_j$  with  $b_{j+1}$  or replacing  $b_{j+1}$  with  $b_j$  can further decrease the loss  $\tilde{\mathbf{L}} = \mathbf{N}^{-1}\mathbf{L}$ . Consider the following sets.

$$\begin{aligned}
 A_1 &= \{i : y_i < j + 1 \implies z_{y_i}^j = z_{y_i}^{j+1} = -1\} \\
 A_2 &= \{i : y_i > j + 1 \implies z_{y_i}^j = z_{y_i}^{j+1} = +1\} \\
 A_3 &= \{i : y_i = j + 1 \implies z_{y_i}^j = -1, z_{y_i}^{j+1} = +1\}
 \end{aligned}$$

The above three sets are mutually exclusive and exhaustive, i.e.,  $A_1 \cup A_2 \cup A_3 = \{1, 2, \dots, N\}$ .

1. **Change in  $l_{IMC}$  for  $A_1$ :** The change in  $l_{IMC}$  when replacing  $b_j$  with  $b_{j+1}$  is

$$\Delta^a l_{IMC}(f(\mathbf{x}), y_i) = \max(0, -1(g(\mathbf{x}_i) + b_{j+1}) + 1) - \max(0, -1(g(\mathbf{x}_i) + b_j) + 1)$$

The change in  $l_{IMC}$  when replacing  $b_{j+1}$  with  $b_j$

$$\Delta^b l_{IMC}(f(\mathbf{x}), y_i) = \max(0, -1(g(\mathbf{x}_i) + b_j) + 1) - \max(0, -1(g(\mathbf{x}_i) + b_{j+1}) + 1)$$

The total change in loss  $L_{IMC}$  after swapping  $b_j$  and  $b_{j+1}$  is  $(\Delta^a + \Delta^b)l_{IMC}(f(\mathbf{x}), y_i) = 0$

2. **Change in  $l_{IMC}$  for  $A_2$ :** The change in  $l_{IMC}$  when replacing  $b_j$  with  $b_{j+1}$  is

$$\Delta^a l_{IMC}(f(\mathbf{x}), y_i) = \max(0, +1(g(\mathbf{x}_i) + b_{j+1}) + 1) - \max(0, +1(g(\mathbf{x}_i) + b_j) + 1)$$

The change in  $l_{IMC}$  replacing  $b_{j+1}$  with  $b_j$

$$\Delta^b l_{IMC}(f(\mathbf{x}), y_i) = \max(0, +1(g(\mathbf{x}_i) + b_j) + 1) - \max(0, +1(g(\mathbf{x}_i) + b_{j+1}) + 1)$$

The total change in loss  $L_{IMC}$  after swapping  $b_j$  and  $b_{j+1}$  is  $(\Delta^a + \Delta^b)l_{IMC}(f(\mathbf{x}), y_i) = 0$

3. **Change in  $l_{IMC}$  for  $A_3$ :** The change in  $l_{IMC}$  when replacing  $b_j$  with  $b_{j+1}$  is

$$\begin{aligned}\Delta^a l_{IMC}(f(\mathbf{x}), y_i) &= \max(0, -1(g(\mathbf{x}_i) + b_{j+1}) + 1) - \max(0, -1(g(\mathbf{x}_i) + b_j) + 1) \\ &= \max(0, -b_{j+1} - g(\mathbf{x}_i) + 1) - \max(0, -b_j - g(\mathbf{x}_i) + 1 + 1) \leq 0\end{aligned}$$

The change in  $l_{IMC}$  replacing  $b_{j+1}$  with  $b_j$

$$\begin{aligned}\Delta^b l_{IMC}(f(\mathbf{x}), y_i) &= \max(0, +1(g(\mathbf{x}_i) + b_j) + 1) - \max(0, +1(g(\mathbf{x}_i) + b_{j+1}) + 1) \\ &= \max(0, g(\mathbf{x}_i) + b_j + 1) - \max(0, g(\mathbf{x}_i) + b_{j+1} + 1) \leq 0\end{aligned}$$

Now suppose  $\Delta^a l_{IMC}(f(\mathbf{x}), y_i) = 0$ . Since  $b_j < b_{j+1}$  we have

$$g(\mathbf{x}_i) + b_j \geq 1 \quad \text{and} \quad g(\mathbf{x}_i) + b_{j+1} > 1 \quad (1)$$

From 1, we have in  $\Delta^b l_{IMC}(f(\mathbf{x}), y_i)$ ,

$$\begin{aligned}\Delta^b l_{IMC}(f(\mathbf{x}), y_i) &= \max(0, g(\mathbf{x}_i) + b_j + 1) - \max(0, g(\mathbf{x}_i) + b_{j+1} + 1) \\ &= b_{j+1} - b_j < 0\end{aligned}$$

Similarly, if  $\Delta^b l_{IMC}(f(\mathbf{x}), y_i) = 0$ , we will have  $\Delta^a l_{IMC}(f(\mathbf{x}), y_i) < 0$ . The total change in loss  $l_{IMC}$  after swapping  $b_j$  and  $b_{j+1}$  and given that  $b_j < b_{j+1}$  is

$$(\Delta^a + \Delta^b)l_{IMC}(f(\mathbf{x}), y_i) < 0$$

Hence

$$(\Delta^a + \Delta^b)l_{IMC}(f(\mathbf{x}), y_i) = \begin{cases} \delta, & \text{if } y_i = j + 1 \\ 0, & \text{if } y_i \neq j + 1 \end{cases}$$

for some  $\delta < 0$ . Now using similar arguments as Theorem-1, Section 1.2 we get that  $\tilde{l}_{IMC}$  is rank consistent too.

## 2. Proof of Theorem 2

We are given that  $\mathbb{E}_{\tilde{y}}[b_i^t - b_{i+1}^t] \geq 0$ ,  $i \in [K - 1]$ . Let at the  $t^{th}$  iteration example  $(\mathbf{x}^t, \tilde{y}^t)$  is being presented to the network. Loss  $\tilde{l}_{CE}$  corresponding to  $(\mathbf{x}^t, \tilde{y}^t)$  is as follows.

$$\begin{aligned}\tilde{l}_{CE}(g(\mathbf{x}^t), \mathbf{b}, \tilde{y}^t) &= \sum_{j=1}^K \mathbf{N}_{(\tilde{y}^t, j)}^{-1} l_{CE}(g(\mathbf{x}^t), \mathbf{b}, j) \\ &= - \sum_{j=1}^K \mathbf{N}_{(\tilde{y}^t, j)}^{-1} \sum_{i=1}^{K-1} \left( \log h_i(\mathbf{x}^t)^{z_i^j} + \log(1 - h_i(\mathbf{x}^t))^{(1-z_i^j)} \right)\end{aligned}$$

For every  $j = 1 \dots K - 1$ ,  $z_i^j$  are defined as follows.  $z_i^j = 1$ ,  $\forall i < j$  and  $z_i^j = 0$ ,  $\forall i \geq j$ . The update equation using SGD requires to compute the partial derivative of the parameters with respect

to the loss function  $\tilde{l}_{CE}$ . We see the following.

$$\begin{aligned} \frac{\partial \tilde{l}_{CE}(g(\mathbf{x}^t), \mathbf{b}, \tilde{y}^t)}{\partial b_i} &= - \sum_{j=1}^K \mathbf{N}_{(\tilde{y}^t, j)}^{-1} \left[ z_i^j \frac{\partial \log(h_i(\mathbf{x}^t))}{\partial b_i} + (1 - z_i^j) \frac{\partial \log(1 - h_i(\mathbf{x}^t))}{\partial b_i} \right] \\ &= - \sum_{j=1}^K \mathbf{N}_{(\tilde{y}^t, j)}^{-1} \left( \frac{z_i^j}{h_i(\mathbf{x}^t)} - \frac{1 - z_i^j}{1 - h_i(\mathbf{x}^t)} \right) \frac{\partial h_i(\mathbf{x}^t)}{\partial b_i} \\ &= - \sum_{j=1}^K \mathbf{N}_{(\tilde{y}^t, j)}^{-1} \left( z_i^j (1 - h_i(\mathbf{x}^t)) - (1 - z_i^j) h_i(\mathbf{x}^t) \right) \end{aligned}$$

The update equations for thresholds  $b_1, \dots, b_{K-1}$  using SGD are as follows. Let  $\alpha$  be the learning rate.

$$\begin{aligned} b_i^{t+1} &= b_i^t - \alpha \frac{\partial \tilde{l}_{CE}(g^t(\mathbf{x}^t), \mathbf{b}^t, \tilde{y}^t)}{\partial b_i} \\ &= b_i^t + \alpha \sum_{j=1}^K \mathbf{N}_{(\tilde{y}^t, j)}^{-1} \left( z_i^j (1 - \sigma(g^t(\mathbf{x}^t) + b_i^t)) - (1 - z_i^j) \sigma(g^t(\mathbf{x}^t) + b_i^t) \right) \end{aligned}$$

Using the above equation, we compute the following.

$$\begin{aligned} b_i^{t+1} - b_{i+1}^{t+1} &= b_i^t - b_{i+1}^t + \alpha \sum_{j=1}^K \mathbf{N}_{(\tilde{y}^t, j)}^{-1} \left( z_i^j (1 - h_i^t(\mathbf{x}^t)) - (1 - z_i^j) h_i^t(\mathbf{x}^t) - z_{i+1}^j (1 - h_{i+1}^t(\mathbf{x}^t)) \right. \\ &\quad \left. + (1 - z_{i+1}^j) h_{i+1}^t(\mathbf{x}^t) \right) \\ &= b_i^t - b_{i+1}^t + \alpha \sum_{j=1}^K \mathbf{N}_{(\tilde{y}^t, j)}^{-1} \left[ z_i^j - h_i^t(\mathbf{x}^t) - z_{i+1}^j + h_{i+1}^t(\mathbf{x}^t) \right] \end{aligned}$$

For every  $j \in \{1, \dots, K\}$ , there can be three possibilities as follows. (a)  $z_i^j = z_{i+1}^j = 0$ , (b)  $z_i^j = z_{i+1}^j = 1$  and (c)  $z_i^j = 1, z_{i+1}^j = 0$ . Thus, we can rewrite  $b_i^{t+1} - b_{i+1}^{t+1}$  as follows.

$$\begin{aligned} b_i^{t+1} - b_{i+1}^{t+1} &= b_i^t - b_{i+1}^t + \alpha \sum_{z_i^j = z_{i+1}^j} \mathbf{N}_{(\tilde{y}^t, j)}^{-1} \left[ h_{i+1}^t(\mathbf{x}^t) - h_i^t(\mathbf{x}^t) \right] + \alpha \sum_{z_i^j = 1, z_{i+1}^j = 0} \mathbf{N}_{(\tilde{y}^t, j)}^{-1} \left[ 1 + h_{i+1}^t(\mathbf{x}^t) - h_i^t(\mathbf{x}^t) \right] \\ &= b_i^t - b_{i+1}^t + \alpha \sum_{j=1}^K \mathbf{N}_{(\tilde{y}^t, j)}^{-1} \left[ h_{i+1}^t(\mathbf{x}^t) - h_i^t(\mathbf{x}^t) \right] + \alpha \sum_{z_i^j = 1, z_{i+1}^j = 0} \mathbf{N}_{(\tilde{y}^t, j)}^{-1} \end{aligned}$$

Using properties of noise matrix, we know that  $\sum_{j=1}^K \mathbf{N}_{(\tilde{y}^t, j)}^{-1} = 1$ . Thus,

$$b_i^{t+1} - b_{i+1}^{t+1} = b_i^t - b_{i+1}^t - \alpha \left[ h_i^t(\mathbf{x}^t) - h_{i+1}^t(\mathbf{x}^t) \right] + \alpha \sum_{z_i^j = 1, z_{i+1}^j = 0} \mathbf{N}_{(\tilde{y}^t, j)}^{-1}$$

The only possibility for  $z_i^j = 1, z_{i+1}^j = 0$  is  $j = i + 1$ . Thus,

$$b_i^{t+1} - b_{i+1}^{t+1} = b_i^t - b_{i+1}^t - \alpha \left[ h_i^t(\mathbf{x}^t) - h_{i+1}^t(\mathbf{x}^t) \right] + \alpha \mathbf{N}_{(\tilde{y}^t, i+1)}^{-1}.$$

Since  $\mathbf{N}_{(\tilde{y}^t, i+1)}^{-1}$  updates depend on  $\tilde{y}^t$ , we take the expectation on both sides with respect to  $\tilde{y}$ , we get the following.

$$\mathbb{E}_{\tilde{y}}[b_i^{t+1} - b_{i+1}^{t+1}] \geq \mathbb{E}_{\tilde{y}} \left[ b_i^t - b_{i+1}^t - \alpha (h_i^t(\mathbf{x}^t) - h_{i+1}^t(\mathbf{x}^t)) \right] + \alpha \mathbb{E}_{\tilde{y}}[\mathbf{N}_{(\tilde{y}^t, i+1)}^{-1}]$$

We know that,  $h_i^t(\mathbf{x}^t) = \sigma(g^t(\mathbf{x}^t) + b_i^t)$ . Also,  $b_i^t \geq b_{i+1}^t$ . Using the Mean-Value Theorem,  $\exists \theta \in (b_{i+1}^t, b_i^t)$  such that

$$\begin{aligned} \frac{h_i^t(\mathbf{x}^t) - h_{i+1}^t(\mathbf{x}^t)}{b_i^t - b_{i+1}^t} &= \frac{\partial \sigma(g^t(\mathbf{x}^t) + b)}{\partial b} \Big|_{\theta} \\ &= \sigma(g^t(\mathbf{x}^t) + \theta)(1 - \sigma(g^t(\mathbf{x}^t) + \theta)). \end{aligned}$$

We know that  $0 < \sigma(g^t(\mathbf{x}^t) + \theta)(1 - \sigma(g^t(\mathbf{x}^t) + \theta)) \leq 0.25, \forall \theta \in \mathbb{R}$ . Using this, we get,

$$\begin{aligned} b_i^t - b_{i+1}^t - \alpha (\sigma(g^t(\mathbf{x}^t) + b_i^t) - \sigma(g^t(\mathbf{x}^t) + b_{i+1}^t)) &= (1 - \alpha \frac{\partial \sigma(g^t(\mathbf{x}^t) + b')}{\partial b})(b_i^t - b_{i+1}^t) \\ &\geq (1 - 0.25\alpha)(b_i^t - b_{i+1}^t) \geq 0 \end{aligned}$$

where the last inequality holds when  $\alpha \leq 4$ . Thus for  $b_i^t \geq b_{i+1}^t$ , we get

$$b_i^t - b_{i+1}^t - \alpha \left[ h_i^t(\mathbf{x}^t) - h_{i+1}^t(\mathbf{x}^t) \right] \geq 0, \forall \alpha \leq 4. \quad (2)$$

We know that

$$\mathbb{E}_{\tilde{y}}[b_i^{t+1} - b_{i+1}^{t+1}] \geq \mathbb{E}_{\tilde{y}} \left[ b_i^t - b_{i+1}^t - \alpha (h_i^t(\mathbf{x}^t) - h_{i+1}^t(\mathbf{x}^t)) \right] + \alpha \mathbb{E}_{\tilde{y}}[\mathbf{N}_{(\tilde{y}^t, i+1)}^{-1}].$$

Now, we using the result in eq.(2), we get the following.

$$\begin{aligned} \mathbb{E}_{\tilde{y}}[b_i^{t+1} - b_{i+1}^{t+1}] &\geq \alpha \mathbb{E}_{\tilde{y}}[\mathbf{N}_{(\tilde{y}^t, i+1)}^{-1}] = \alpha \sum_{k=1}^K P(\tilde{y} = k) \mathbf{N}_{(k, i+1)}^{-1} \\ &= \alpha \sum_{k=1}^K \mathbf{N}_{(k, i+1)}^{-1} \sum_{j=1}^K P(y = j) P(\tilde{y} = k | y = j) = \alpha \sum_{j=1}^K P(y = j) \sum_{k=1}^K \eta_{(j, k)} \mathbf{N}_{(k, i+1)}^{-1} \\ &= \alpha \sum_{j=1}^K P(y = j) \mathbb{I}_{\{j=i+1\}} = \alpha P(y = i + 1) \geq 0. \end{aligned}$$

Thus, we have shown that  $\mathbb{E}_{\tilde{y}}[b_i^{t+1} - b_{i+1}^{t+1}] \geq 0$ . This completes our proof that SGD gives the optimal solution maintaining rank consistency.

### 3. Proof of Theorem 3

Let at  $t^{\text{th}}$  iteration example  $(\mathbf{x}^t, \tilde{y}^t)$  is being presented to the network. Loss  $\tilde{l}_{IMC}$  corresponding to  $(\mathbf{x}^t, \tilde{y}^t)$  is described as follows.

$$\tilde{l}_{IMC}(g(\mathbf{x}^t), \mathbf{b}, \tilde{y}^t) = \sum_{j=1}^K \mathbf{N}_{(\tilde{y}^t, j)}^{-1} \sum_{i=1}^{K-1} \left[ 0, 1 - z_i^j (g(\mathbf{x}^t) + b_i) \right]_+$$

Where  $z_i^j = 1, \forall i < j$  and  $z_i^j = -1, \forall i \geq j$ . We first find the sub-gradient of  $\tilde{l}_{IMC}$  w.r.t  $b_i$ .

$$\frac{\partial \tilde{l}_{IMC}(g(\mathbf{x}^t), \mathbf{b}, \tilde{y}^t)}{\partial b_i} = - \sum_{j=1}^K \mathbf{N}_{(\tilde{y}^t, j)}^{-1} z_i^j \mathbb{I}[z_i^j (g(\mathbf{x}^t) + b_i) < 1]$$

Hence the SGD based update equation for  $b_i$  (with step size  $\alpha$ ) is as follows.

$$\begin{aligned} b_i^{t+1} &= b_i^t + \alpha \sum_{j=1}^K \mathbf{N}_{(\tilde{y}^t, j)}^{-1} z_i^j \mathbb{I}[z_i^j (g^t(\mathbf{x}^t) + b_i^t) < 1] \\ &= b_i^t + \alpha \sum_{j \leq i} \mathbf{N}_{(\tilde{y}^t, j)}^{-1} z_i^j \mathbb{I}[z_i^j (g^t(\mathbf{x}^t) + b_i^t) < 1] + \alpha \sum_{j > i} \mathbf{N}_{(\tilde{y}^t, j)}^{-1} z_i^j \mathbb{I}[z_i^j (g^t(\mathbf{x}^t) + b_i^t) < 1] \\ &= b_i^t - \alpha \sum_{j \leq i} \mathbf{N}_{(\tilde{y}^t, j)}^{-1} \mathbb{I}[g^t(\mathbf{x}^t) + b_i^t > -1] + \alpha \sum_{j > i} \mathbf{N}_{(\tilde{y}^t, j)}^{-1} \mathbb{I}[g^t(\mathbf{x}^t) + b_i^t < 1] \end{aligned}$$

Where we used the definition of  $z_i^j$ . Now, we take the expectation with respect to  $\tilde{y}^t$  on both size, and using the fact that  $\mathbb{E}_{\tilde{y}^t}[\mathbf{N}_{(\tilde{y}^t, j)}^{-1}] = P(y = j)$ , we get the following.

$$\begin{aligned} \mathbb{E}_{\tilde{y}^t}[b_i^{t+1} - b_i^t] &= -\alpha \sum_{j \leq i} \mathbb{E}_{\tilde{y}^t}[\mathbf{N}_{(\tilde{y}^t, j)}^{-1}] \mathbb{I}[g^t(\mathbf{x}^t) + b_i^t > -1] + \alpha \sum_{j > i} \mathbb{E}_{\tilde{y}^t}[\mathbf{N}_{(\tilde{y}^t, j)}^{-1}] \mathbb{I}[g^t(\mathbf{x}^t) + b_i^t < 1] \\ &= -\alpha \sum_{j \leq i} P(y = j) \mathbb{I}[g^t(\mathbf{x}^t) + b_i^t > -1] + \alpha \sum_{j > i} P(y = j) \mathbb{I}[g^t(\mathbf{x}^t) + b_i^t < 1] \\ &= -\alpha P(y \leq i) \mathbb{I}[g^t(\mathbf{x}^t) + b_i^t > -1] + \alpha P(y > i) \mathbb{I}[g^t(\mathbf{x}^t) + b_i^t < 1] \end{aligned}$$

Using this, we now compute the following.

$$\begin{aligned} \mathbb{E}_{\tilde{y}^t}[b_i^{t+1} - b_{i+1}^{t+1} - b_i^t + b_{i+1}^t] &= \mathbb{E}_{\tilde{y}^t}[b_i^{t+1} - b_i^t] - \mathbb{E}_{\tilde{y}^t}[b_{i+1}^{t+1} - b_{i+1}^t] \\ &= -\alpha P(y \leq i) \mathbb{I}[g^t(\mathbf{x}^t) + b_i^t > -1] + \alpha P(y > i) \mathbb{I}[g^t(\mathbf{x}^t) + b_i^t < 1] \\ &\quad + \alpha P(y \leq i+1) \mathbb{I}[g^t(\mathbf{x}^t) + b_{i+1}^t > -1] - \alpha P(y > i+1) \mathbb{I}[g^t(\mathbf{x}^t) + b_{i+1}^t < 1] \\ &= \alpha [P(y \leq i+1) - P(y \leq i)] \mathbb{I}[g^t(\mathbf{x}^t) + b_{i+1}^t > -1] + \alpha [P(y > i) - P(y > i+1)] \mathbb{I}[g^t(\mathbf{x}^t) + b_i^t < 1] \end{aligned}$$

But, we know that

$$\begin{aligned} P(y > i) - P(y > i+1) &\geq 0, \forall i \in [K-1] \\ P(y \leq i+1) - P(y \leq i) &\geq 0, \forall i \in [K-1] \end{aligned}$$

and  $\mathbb{I}[\cdot] \in \{0, 1\}$ . Thus,

$$\begin{aligned} \mathbb{E}_{\tilde{y}}[(b_i^{t+1} - b_{i+1}^{t+1}) - (b_i^t - b_{i+1}^t)] &\geq 0 \\ \Rightarrow \mathbb{E}_{\tilde{y}}[b_i^{t+1} - b_{i+1}^{t+1}] &\geq \mathbb{E}_{\tilde{y}}[b_i^t - b_{i+1}^t] = b_i^t - b_{i+1}^t \geq 0 \end{aligned}$$

This completes the proof.

#### 4. Generalisation bounds

Using unbiased estimator, we have

$$\begin{aligned} \tilde{l}(g(\mathbf{x}), \mathbf{b}, y) &= \sum_{j=1}^K \mathbf{N}_{(y,j)}^{-1} l(g(\mathbf{x}), \mathbf{b}, j) = \sum_{j=1}^K \mathbf{N}_{(y,j)}^{-1} \sum_{i=1}^{K-1} l^i(g(\mathbf{x}), \mathbf{b}, z_i^j) \\ &= \sum_{i=1}^{K-1} \left( \sum_{j=1}^K \mathbf{N}_{(y,j)}^{-1} l^i(g(\mathbf{x}), \mathbf{b}, z_i^j) \right) = \sum_{i=1}^{K-1} \tilde{l}^i(g(\mathbf{x}), \mathbf{b}, i) \end{aligned}$$

For any  $i$ , if  $l^i$  is  $L$ -Lipschitz, then  $\tilde{l}^i$  is  $\tilde{L} = (\sum_{j=1}^K |\mathbf{N}_{(y,j)}^{-1}|)L \leq ML$  Lipschitz constant, where  $M = \max_y \sum_{j=1}^K |\mathbf{N}_{(y,j)}^{-1}|$ . Using Lipschitz composition property of basic Rademacher generalisation bounds on  $i^{\text{th}}$  binary classifier, with probability atleast  $1 - \delta$

$$R_{\tilde{l}^i, D_\rho}(f^i) \leq \hat{R}_{\tilde{l}^i, S}(f^i) + 2ML\mathfrak{R}(\mathcal{F}) + \sqrt{\frac{\log(1/\delta)}{2n}} \quad (3)$$

where  $f^i$  is the  $i^{\text{th}}$  binary classifier. Adding the maximal deviations between expected risk and empirical risk for all the  $K - 1$  classifiers,

$$R_{\tilde{l}, D_\rho}(f) \leq \hat{R}_{\tilde{l}, S}(f) + 2ML(K - 1)\mathfrak{R}(\mathcal{F}) + (K - 1)\sqrt{\frac{\log(1/\delta)}{2n}} \quad (4)$$

which is true for any  $f$ . Let  $\hat{f} \leftarrow \arg \min_{f \in \mathcal{F}} \hat{R}_{\tilde{l}, S}(f)$  and  $f^* \leftarrow \arg \min_{f \in \mathcal{F}} R_{l, D}(f)$ . Following Theorem 3 from [Natarajan et al. \(2013\)](#),

$$\begin{aligned} R_{l, D}(\hat{f}) - R_{l, D}(f^*) &= R_{\tilde{l}, D_\rho}(\hat{f}) - R_{\tilde{l}, D_\rho}(f^*) \\ &= \hat{R}_{\tilde{l}, S}(\hat{f}) - \hat{R}_{\tilde{l}, S}(f^*) + (R_{\tilde{l}, D_\rho}(\hat{f}) - \hat{R}_{\tilde{l}, S}(\hat{f})) + (\hat{R}_{\tilde{l}, S}(f^*) - R_{\tilde{l}, D_\rho}(f^*)) \\ &\leq 2 \max_{f \in \mathcal{F}} |R_{\tilde{l}, D_\rho}(f) - \hat{R}_{\tilde{l}, S}(f)| \end{aligned} \quad (5)$$

From 4 and 5, we get,

$$R_{l, D}(\hat{f}) \leq R_{l, D}(f^*) + 4ML(K - 1)\mathfrak{R}(\mathcal{F}) + 2(K - 1)\sqrt{\frac{\log(1/\delta)}{2n}}$$

#### References

Nagarajan Natarajan, Inderjit S. Dhillon, Pradeep Ravikumar, and Ambuj Tewari. Learning with noisy labels. In *NIPS*, pages 1196–1204, 2013.
